# Supplementary material
Source: publisher figshare collection journal article supplement (https://geolsoc.figshare.com/ndownloader/files/27232734)
Supplement: Supplementary file 1 [file 27232734]

## Sheet:  Major-Element
		SiO2	Al2O3	TiO2	Fe2O3	FeO	CaO	MgO	K2O	Na2O	MnO	P2O5	H2O+	H2O-		Total		SiO2	Al2O3	TiO2	Fe2O3	FeO	CaO	MgO	K2O	Na2O	MnO	P2O5	K2O+Na2O	K2O/Na2O	A	F	M	FeOT
QDVF	QTDB-01	63.06	15.94	1.27	1.79	1.56	3.06	1.11	5.35	3.79	0.07	0.56	0	0	1	99.54	97.56	64.6371	16.3387	1.30176	1.83477	1.59902	3.13653	1.13776	5.4838	3.88479	0.0717507	0.574006	9.36859	1.41161	9.36859	3.25031	1.13776	3.25031	0.19197	1.41161
QVF	PM007-1	53.72	13.26	1.36	5.02	1.95	6.61	4.72	4.53	3.81	0.09	0.89	0	0	0.82	100.09	95.96	55.9817	13.8183	1.41726	5.23135	2.0321	6.88829	4.91872	4.72072	3.9704	0.0937891	0.92747	8.69112	1.18898	8.69112	6.74031	4.91872	6.74031	0.498492	1.18898
QVF	PM007-4	53.75	13.55	1.43	6.09	1.05	7.03	4.9	4.32	3.81	0.09	0.92	0	0	0.5	99.9	96.94	55.4467	13.9777	1.47514	6.28224	1.08314	7.25191	5.05467	4.45636	3.93027	0.0928409	0.949041	8.38663	1.13386	8.38663	6.73716	5.05467	6.73716	0.518819	1.13386
QVF	PM007-5	55.73	13.71	1.43	4.82	2.3	6.1	4.49	4.84	4.03	0.09	0.9	0	0	1.08	100.19	98.44	56.6132	13.9273	1.45266	4.89638	2.33645	6.19667	4.56115	4.9167	4.09386	0.0914262	0.914262	9.01056	1.20099	9.01056	6.74319	4.56115	6.74319	0.444931	1.20099
QVF	PM007-6	54.55	13.54	1.43	5.1	2.4	6.84	4.66	4.47	3.77	0.1	0.95	0	0	0.06	100.14	97.81	55.7714	13.8432	1.46202	5.21419	2.45374	6.99315	4.76434	4.57008	3.85441	0.102239	0.971271	8.4245	1.18568	8.4245	7.14651	4.76434	7.14651	0.50517	1.18568
QVF	PM007-7	57.27	13.31	1.16	3.94	1.61	5.47	3.38	5.19	4.25	0.08	0.77	0	0	1.82	99.43	96.43	59.3902	13.8028	1.20295	4.08587	1.6696	5.67251	3.50513	5.38214	4.40734	0.0829617	0.798507	9.78948	1.22118	9.78948	5.34688	3.50513	5.34688	0.410969	1.22118
QVF	PM007-8	58.12	13.41	1.17	3.96	1.44	5.34	3.35	5.3	4.04	0.08	0.72	0	0	0.9	100.02	96.93	59.9608	13.8347	1.20706	4.08542	1.48561	5.50913	3.4561	5.46786	4.16796	0.0825338	0.742804	9.63582	1.31188	9.63582	5.16249	3.4561	5.16249	0.39821	1.31188
QVF	PM007-10	60.5	14.15	1.12	3.48	1.46	4.55	2.97	5.54	4.22	0.07	0.76	0	0	1.37		98.82	61.2224	14.319	1.13337	3.52155	1.47743	4.60433	3.00546	5.60615	4.27039	0.0708359	0.769075	9.87654	1.3128	9.87654	4.64683	3.00546	4.64683	0.321555	1.3128
QVF	PM007-9	58.4	13.88	1.14	3.78	1.55	5.36	3.28	5.34	4.05	0.08	0.76	0	0	-0.45	100.07	97.62	59.8238	14.2184	1.16779	3.87216	1.58779	5.49068	3.35997	5.47019	4.14874	0.0819504	0.778529	9.61893	1.31852	9.61893	5.07273	3.35997	5.07273	0.386167	1.31852
QVF	PM007-11	61.71	13.72	1.08	4.06	0.76	4.34	2.65	5.69	4.25	0.07	0.71	0	0	-0.38	100.3	99.04	62.3082	13.853	1.09047	4.09935	0.767367	4.38207	2.67569	5.74515	4.2912	0.0706785	0.716882	10.0363	1.33882	10.0363	4.45679	2.67569	4.45679	0.316327	1.33882
QVF	PM007-12	61.16	14.03	1.12	3.55	1.16	4.44	2.8	5.74	4.31	0.06	0.77	0	0	-0.48	100.38	99.14	61.6905	14.1517	1.12972	3.58079	1.17006	4.47852	2.82429	5.78979	4.34739	0.0605205	0.776679	10.1372	1.33179	10.1372	4.39278	2.82429	4.39278	0.316465	1.33179
QVF	PM007-13	61.07	14.16	1.1	3.36	1.57	4.63	2.76	5.41	4.21	0.07	0.74	0	0	-0.56	100.38	99.08	61.6371	14.2915	1.11021	3.3912	1.58458	4.67299	2.78563	5.46023	4.24909	0.07065	0.746871	9.70933	1.28504	9.70933	4.63666	2.78563	4.63666	0.326977	1.28504
QVF	PM007-14	61.41	13.88	1.13	3.45	1.53	4.65	2.82	5.41	4.02	0.07	0.77	0	0	-0.49	100.23	99.14	61.9427	14.0004	1.1398	3.47993	1.54327	4.69034	2.84446	5.45693	4.05487	0.0706072	0.776679	9.5118	1.34577	9.5118	4.67521	2.84446	4.67521	0.335014	1.34577
QVF	PM007-15	60.6	13.85	1.13	4.49	0.48	5.08	2.61	5.67	4.14	0.07	0.73	0	0	0.71	100.11	98.85	61.305	14.0111	1.14315	4.54224	0.485584	5.1391	2.64036	5.73596	4.18816	0.0708144	0.738493	9.92413	1.36957	9.92413	4.5736	2.64036	4.5736	0.366787	1.36957
QVF	K89G186	49.8	13.65	1.77	3.27	2.94	7.2	5.6	4.7	3.8	0.12	1.25	3.8	0.35	-0.54	100.12	94.1	52.9224	14.5058	1.88098	3.47503	3.12434	7.65143	5.95112	4.99469	4.03826	0.127524	1.32837	9.03294	1.23684	9.03294	6.25186	5.95112	6.25186	0.527473	1.23684
QVF	K89G191	56.95	14.1	1.36	2.86	2.57	6.45	3.8	4.75	3.89	0.1	0.99	0.76	0.25			97.82	58.2192	14.4142	1.39031	2.92374	2.62727	6.59374	3.88469	4.85586	3.97669	0.102229	1.01206	8.83255	1.22108	8.83255	5.25864	3.88469	5.25864	0.457447	1.22108
QVF	K89G192	57.5	14.15	1.32	2.82	2.54	5.85	3.36	5.15	4.1	0.09	0.97	0.7	0.45			97.85	58.7634	14.4609	1.349	2.88196	2.59581	5.97854	3.43383	5.26316	4.19009	0.0919775	0.991313	9.45324	1.2561	9.45324	5.18958	3.43383	5.18958	0.413428	1.2561
QVF	1	57.44	14.63	1.3	4.39	1.75	6.12	3.1	4.92	4.28	0.06	0.92	0.77	0			98.91	58.073	14.7912	1.31433	4.43838	1.76929	6.18744	3.13416	4.97422	4.32717	0.0606612	0.930139	9.30139	1.14953	9.30139	5.76383	3.13416	5.76383	0.418319	1.14953
QVF	2	55.53	14.65	1.62	5.1	1.84	6.44	3.8	4.9	3.8	0.09	0.91	0	0	0.91		98.68	56.2728	14.846	1.64167	5.16822	1.86461	6.52615	3.85083	4.96555	3.85083	0.0912039	0.922173	8.81638	1.28947	8.81638	6.51601	3.85083	6.51601	0.43959	1.28947
QVF	3	50.81	14.03	1.55	3.14	3.45	9.53	3.95	4.09	3.89	0.09	1.02	1.63	0	1.58		95.55	53.1763	14.6834	1.62219	3.28624	3.61068	9.97384	4.13396	4.28048	4.07117	0.0941915	1.0675	8.35165	1.05141	8.35165	6.56829	4.13396	6.56829	0.679259	1.05141
QVF	4	51.15	14.36	1.68	3.61	4.63	7.6	5.35	3.62	3.85	0.13	0.97	0.92	0	2.02		96.95	52.7592	14.8118	1.73285	3.72357	4.77566	7.83909	5.51831	3.73388	3.97112	0.13409	1.00052	7.705	0.94026	7.705	8.12687	5.51831	8.12687	0.529248	0.94026
QVF	5	51.8	14.8	1.9	4.62	3.15	7.04	4.5	4.23	3.75	0.11	1.14	0.88	0	1.91		97.04	53.38	15.2514	1.95796	4.76092	3.24608	7.25474	4.63726	4.35903	3.86439	0.113355	1.17477	8.22341	1.128	8.22341	7.53092	4.63726	7.53092	0.475676	1.128
QVF	6	51.74	14.5	1.87	3.5	4.66	7.22	4.82	4.15	4.17	0.11	1.11	0.5	0	1.28		97.85	52.8769	14.8186	1.91109	3.5769	4.76239	7.37864	4.92591	4.24119	4.26162	0.112417	1.13439	8.50281	0.995204	8.50281	7.9816	4.92591	7.9816	0.497931	0.995204
QVF	7	49.83	14.01	1.73	5.35	3.3	7.2	5.21	3.98	3.55	0.12	1.04	1.58	0	2.3		95.32	52.2765	14.6979	1.81494	5.61267	3.46202	7.5535	5.4658	4.17541	3.7243	0.125892	1.09106	7.89971	1.12113	7.89971	8.51343	5.4658	8.51343	0.513919	1.12113
QVF	8	51.33	14.5	1.93	3.94	4.12	7.44	4.15	4.37	3.84	0.11	1.23	0.52	0	1.7		96.96	52.9394	14.9546	1.99051	4.06353	4.24917	7.67327	4.28012	4.50701	3.9604	0.113449	1.26856	8.46741	1.13802	8.46741	7.90635	4.28012	7.90635	0.513103	1.13802
QVF	9	51.46	14.68	1.98	4.83	4.81	7.5	3.5	4.01	3.92	0.13	1.15	0.78	0	1.18		97.97	52.5263	14.9842	2.02103	4.93008	4.90967	7.6554	3.57252	4.09309	4.00122	0.132694	1.17383	8.09431	1.02296	8.09431	9.34674	3.57252	9.34674	0.510899	1.02296
KVF	KP39-1	47.42	13.46	1.95	5.28	3.5	8.19	7.17	2.3	5.08	0.14	1.34	2.46	0	1.56		95.83	49.4835	14.0457	2.03485	5.50976	3.6523	8.54638	7.482	2.40008	5.30105	0.146092	1.39831	7.70114	0.452756	7.70114	8.61108	7.482	8.61108	0.60847	0.452756
KVF	KP39-2	49.11	13.12	1.56	3.93	5.75	8.46	8.06	2.29	2.95	0.13	0.7	1.88	0	1.14		96.06	51.1243	13.6581	1.62399	4.09119	5.98584	8.807	8.39059	2.38393	3.071	0.135332	0.728711	5.45492	0.776271	5.45492	9.66792	8.39059	9.66792	0.644817	0.776271
KVF	KP39-3	47.85	12.89	1.89	4.07	4.42	7.87	7.86	5.22	2.98	0.13	1.29	1.15	0	1.61		96.47	49.6009	13.3617	1.95916	4.21893	4.58174	8.15798	8.14761	5.41101	3.08904	0.134757	1.3372	8.50005	1.75168	8.50005	8.37877	8.14761	8.37877	0.610551	1.75168
KVF	XJ-1	46.61	12.78	2.43	6.19	2.71	10.57	7.05	5.18	2.6	0.13	1.51	0	0	1.82		97.76	47.678	13.0728	2.48568	6.33183	2.77209	10.8122	7.21154	5.29869	2.65957	0.132979	1.5446	7.95827	1.99231	7.95827	8.47074	7.21154	8.47074	0.827074	1.99231
DVF	1	57.88	13.95	1.32	3.71	2.26	5.86	4.2	4.81	4	0.1	0.75	0.19	0	0.46		98.84	58.5593	14.1137	1.33549	3.75354	2.28652	5.92877	4.24929	4.86645	4.04694	0.101174	0.758802	8.9134	1.2025	8.9134	5.66471	4.24929	5.66471	0.420072	1.2025
DVF	2	57.89	14.26	1.37	3.32	2.67	5.6	4.05	4.98	4.02	0.09	0.76	0.4	0	0.11		99.01	58.4688	14.4026	1.3837	3.3532	2.6967	5.65599	4.0905	5.02979	4.0602	0.0908999	0.767599	9.08999	1.23881	9.08999	5.71457	4.0905	5.71457	0.392707	1.23881
DVF	3	57.78	14.01	1.7	3.72	2.36	5.76	4.06	4.88	3.85	0.14	0.89	0	0	0.18		99.15	58.2753	14.1301	1.71457	3.75189	2.38023	5.80938	4.09481	4.92184	3.88301	0.1412	0.89763	8.80484	1.26753	8.80484	5.75693	4.09481	5.75693	0.411135	1.26753
DVF	4	59.57	14.05	1.56	3.23	2.18	6.47	2.53	5.32	4.02	0.08	0.75	0	0	0.13		99.76	59.7133	14.0838	1.56375	3.23777	2.18524	6.48557	2.53609	5.3328	4.02967	0.0801925	0.751804	9.36247	1.32338	9.36247	5.09924	2.53609	5.09924	0.460498	1.32338
DVF	5	57.76	14.12	1.31	3.14	2.69	5.34	3.98	5.33	3.98	0.09	0.81					98.55	58.6098	14.3278	1.32927	3.1862	2.72958	5.41857	4.03856	5.40842	4.03856	0.0913242	0.821918	9.44698	1.3392	9.44698	5.59716	4.03856	5.59716	0.378187	1.3392
DVF	6	51.4	13.54	1.7	4.47	3.07	7.32	6.02	6.67	2.52	0.13	1.49					98.33	52.273	13.77	1.72887	4.54592	3.12214	7.44432	6.12224	6.78328	2.5628	0.132208	1.51531	9.34608	2.64683	9.34608	7.21346	6.12224	7.21346	0.54062	2.64683
DVF	7	57.11	14.15	1.39	3	3.04	5.8	3.96	5.24	3.96	0.1	0.9					98.65	57.8915	14.3436	1.40902	3.04105	3.0816	5.87937	4.01419	5.31171	4.01419	0.101368	0.912316	9.3259	1.32323	9.3259	5.81855	4.01419	5.81855	0.409894	1.32323
DVF	8	55.52	14	1.47	4.02	2.57	6.57	3.79	4.97	3.79	0.1	0.96					97.76	56.7921	14.3208	1.50368	4.11211	2.62889	6.72054	3.87684	5.08388	3.87684	0.102291	0.981997	8.96072	1.31135	8.96072	6.32979	3.87684	6.32979	0.469286	1.31135
DVF	9	56.39	14.04	1.37	4.75	1.47	5.99	4.27	5.17	3.83	0.1	0.86					98.24	57.4002	14.2915	1.39454	4.8351	1.49634	6.09731	4.3465	5.26262	3.89862	0.101792	0.875407	9.16124	1.34987	9.16124	5.84792	4.3465	5.84792	0.426638	1.34987
DVF	10	56.93	14.15	1.38	4.85	1.35	5.84	4.15	5.21	3.9	0.1	0.89					98.75	57.6506	14.3291	1.39747	4.91139	1.36709	5.91392	4.20253	5.27595	3.94937	0.101266	0.901266	9.22532	1.3359	9.22532	5.78734	4.20253	5.78734	0.412721	1.3359
QVF	K89G185	51.42	14.62	1.85	3.35	3.02	7.59	4.03	4.77	4.6	0.14	0	1.8	0.29	-0.51	100.3	95.39	53.905	15.3266	1.93941	3.5119	3.16595	7.95681	4.22476	5.00052	4.82231	0.146766	0	9.82283	1.03696	9.82283	6.32666	4.22476	6.32666	0.519152	1.03696
QVF	K89G189	52.2	14.6	1.79	3.29	2.96	7.56	4.21	4.69	3.79	0.12	0	1.8	0.15			95.21	54.8262	15.3345	1.88005	3.45552	3.10892	7.94034	4.4218	4.92595	3.98067	0.126037	0	8.90663	1.23747	8.90663	6.21888	4.4218	6.21888	0.517808	1.23747
QVF	K89G190	56.05	13.77	1.33	2.83	2.55	6.59	4.4	4.35	3.69	0.11	0	2.2	0.2			95.67	58.5868	14.3932	1.3902	2.95809	2.66541	6.88826	4.59914	4.54688	3.85701	0.114979	0	8.40389	1.17886	8.40389	5.32769	4.59914	5.32769	0.478577	1.17886
QVF	K89G193	57.09	14.31	1.31	2.81	2.53	6.74	3.67	4.99	4.06	0.09	0	0.9	0.14			97.6	58.4939	14.6619	1.34221	2.8791	2.59221	6.90574	3.76025	5.1127	4.15984	0.0922131	0	9.27254	1.22906	9.27254	5.1834	3.76025	5.1834	0.470999	1.22906
QVF	K89G200	56.67	13.8	1.43	2.93	2.64	6.35	4.37	5.4	4.02	0.1	0	0.2	0.12			97.71	57.9982	14.1234	1.46351	2.99867	2.70187	6.49882	4.47242	5.52656	4.11422	0.102344	0	9.64077	1.34328	9.64077	5.40068	4.47242	5.40068	0.460145	1.34328
DVF	11	55.3527	13.5689	1.47496	3.56303	2.66667	7.00543	4.43102	4.87794	3.57166	0.0997258	0.95786					97.5699	56.7314	13.9068	1.51169	3.65177	2.73308	7.17991	4.54139	4.99944	3.66062	0.10221	0.981717	8.66005	1.36574	8.66005	6.01968	4.54139	6.01968	0.516287	1.36574
DVF	12	53.0386	15.0306	1.46161	5.51891	0.507864	6.77883	3.52045	4.85984	3.62881	0.0680403	1.16576					95.5793	55.4917	15.7258	1.52921	5.77417	0.531353	7.09235	3.68328	5.08461	3.79665	0.0711872	1.21967	8.88126	1.33924	8.88126	5.72811	3.68328	5.72811	0.451002	1.33924
DVF	13	57.0575	13.7765	1.4285	4.61096	1.46873	6.33176	4.12044	5.10595	3.7891	0.0958806	0.870814					98.6561	57.8347	13.9641	1.44796	4.67378	1.48874	6.41802	4.17657	5.1755	3.84072	0.0971867	0.882677	9.01622	1.34753	9.01622	5.69514	4.17657	5.69514	0.459607	1.34753
DVF	14	55.5757	13.8088	1.5082	4.67899	1.8362	6.80648	4.60172	5.00081	3.74846	0.102832	0.937116					98.6053	56.3617	14.0041	1.52953	4.74517	1.86218	6.90275	4.66681	5.07154	3.80148	0.104286	0.95037	8.87302	1.3341	8.87302	6.13283	4.66681	6.13283	0.492908	1.3341
DVF	15	61.4697	13.9608	1.21678	3.90618	1.12285	4.63342	2.76125	5.29251	3.96443	0.0840866	0.57995					98.9921	62.0956	14.103	1.22917	3.94596	1.13429	4.68059	2.78937	5.3464	4.0048	0.0849427	0.585855	9.3512	1.335	9.3512	4.68565	2.78937	4.68565	0.331887	1.335

## Sheet: Trace-element
稀土元素
elements	chondrite	QDVF-1	DVF-1	DVF-3	DVF-4	DVF(zhang-4)	DVF(Zhang-5)	DVF(Zhang-10)	QVF(K89G186)	QVF(K89G191)	QVF(K89G192)
La	0.2347	129.52	183.42	203.543	171.04	163	151	152	183	137	156
Ce	0.6032	250.04	347.581	345.959	318.491	343	292	294	358	263	290
Pr	0.0891	25.3	37.6447	39.7061	36.1561	34.1	27.8	28	37.4	27.3	29.12
Nd	0.4524	93.84	129.937	132.489	124.43	137	105	105	141	96.3	105
Sm	0.1471	13.62	19.0772	17.8757	17.6788	20.4	14.3	14.6	20	13	15
Eu	0.056	2.78	4.54034	4.38243	4.19486	5.1	3.52	3.55	4.72	2.99	3.24
Gd	0.1966	10.47	13.9883	13.3892	13.2284	12.5	8.77	8.94	12	8.27	9.24
Tb	0.0363	1.13	1.46731	1.38781	1.40431	1.71	1.32	1.18
Dy	0.2427	3.8	5.68587	5.04436	5.4733	6.44	4.31	4.52	6.32	4.51	4.9
Ho	0.0556	0.59	0.844423	0.743172	0.826337	0.84	0.6	0.67
Er	0.1589	1.71	2.33023	2.10338	2.25115	2.23	1.66	1.76	2.71	2.1	2.35
Tm	0.0242	0.2	0.275632	0.230712	0.256603	0.26	0.14	0.18
Yb	0.1625	1.09	1.66309	1.40739	1.55075	1.66	1.17	1.31	1.51	1.59	1.83
Lu	0.0243	0.15	0.24	0.2	0.23	0.22	0.16	0.18	0.19	0.2	0.25
		1	2	5
La		551.853	781.509	867.248	728.759	694.504	643.375	647.635	779.719	583.724	664.678
Ce		414.523	576.228	573.539	528.002	568.634	484.085	487.401	593.501	436.008	480.769
Pr		283.951	422.499	445.635	405.793	382.716	312.009	314.254	419.753	306.397	326.824
Nd		207.427	287.217	292.858	275.044	302.829	232.095	232.095	311.671	212.865	232.095
		150.009	208.453	207.189	197.613	220.755	164.654	165.674	223.817	150.62	167.033
Sm		92.5901	129.688	121.521	120.182	138.681	97.2128	99.2522	135.962	88.3753	101.971
Eu		49.6429	81.0776	78.2576	74.9082	91.0714	62.8571	63.3929	84.2857	53.3929	57.8571
Gd		53.2553	71.151	68.1035	67.2856	63.5809	44.6083	45.473	61.0376	42.0651	46.999
Tb		31.1295	40.4218	38.2316	38.6862	47.1074	36.3636	32.5069	0	0	0
Dy		15.6572	23.4276	20.7844	22.5517	26.5348	17.7585	18.6238	26.0404	18.5826	20.1895
Ho		10.6115	15.1875	13.3664	14.8622	15.1079	10.7914	12.0504	0	0	0
Er		10.7615	14.6647	13.2371	14.1671	14.034	10.4468	11.0761	17.0548	13.2159	14.7892
Tm		8.26446	11.3898	9.53357	10.6034	10.7438	5.78512	7.43802	0	0	0
Yb		6.70769	10.2344	8.66085	9.54307	10.2154	7.2	8.06154	9.29231	9.78462	11.2615
Lu		6.17284	9.87654	8.23045	9.46502	9.0535	6.58436	7.40741	7.81893	8.23045	10.2881

## Sheet: Nd-Sr
	DVF(Zhang)	QVF(K89G185 )	QVF(K89G186）	QVF(K89G189)	QVF(K89G190)	QVF(K89G191)	QVF(K89G192)	QVF(K89G193)	QVF(K89G200)
87Sr/86Sr	0.708148	0.70807	0.70805	0.70802	0.70817	0.70815	0.70812	0.70812	0.70817
143Nd/144Nd	0.51237	0.51233	0.51237	0.51239	0.51235	0.512339	0.512358	0.51233	0.51231
